# Supplementary material for: Optimisation of lactic acid production using cost effective agro residue for food applications
Source: Royal Society of Chemistry journal article supplement (doi:10.1039/d3fb00213f), 2024-01-01
Supplement: d3fb00213f1.pdf [file d3fb00213f1.pdf]

**Supplementary Table 1. Identification and biochemical characterization of bacterial isolates from various food matrices**

| Sl.No                             | Isolate      | Gram's staining | Catalase test | Homofermentative/<br>Heterofermentative | Lactic acid concentration (g/L) |
|-----------------------------------|--------------|-----------------|---------------|-----------------------------------------|---------------------------------|
| <b>I. Source: Milk</b>            |              |                 |               |                                         |                                 |
| 1.                                | DFRM1        | +(ve)           | -(ve)         | Homofermentative                        | 7.2                             |
| 2.                                | DFRM2        | +(ve)           | -(ve)         | Homofermentative                        | 8.1                             |
| 3.                                | DFRM4        | +(ve)           | -(ve)         | Homofermentative                        | 6.3                             |
| <b>4.</b>                         | <b>DFRM8</b> | <b>+(ve)</b>    | <b>-(ve)</b>  | <b>Homofermentative</b>                 | <b>12.6</b>                     |
| 5.                                | DFRM9        | +(ve)           | -(ve)         | Homofermentative                        | 10.8                            |
| 6.                                | DFRCMK1      | +(ve)           | -(ve)         | Homofermentative                        | 3.6                             |
| 7.                                | DFRCMK2      | +(ve)           | -(ve)         | Homofermentative                        | 4.5                             |
| 8.                                | DFRMN1       | +(ve)           | -(ve)         | Homofermentative                        | 6.3                             |
| 9.                                | DFRMN2       | +(ve)           | -(ve)         | Homofermentative                        | 6.3                             |
| 10.                               | DFRMN3       | +(ve)           | -(ve)         | Heterofermentative                      | 3.6                             |
| <b>II. Source: Fermented milk</b> |              |                 |               |                                         |                                 |
| 11.                               | DFRFM1       | +(ve)           | -(ve)         | Homofermentative                        | 8.1                             |
| 12.                               | DFRFM2       | +(ve)           | -(ve)         | Heterofermentative                      | 7.2                             |
| 13.                               | DFRFM3       | +(ve)           | -(ve)         | Homofermentative                        | 6.3                             |
| 14.                               | DFRFM4       | +(ve)           | -(ve)         | Homofermentative                        | 6.3                             |
| 15.                               | DFRFM5       | +(ve)           | -(ve)         | Homofermentative                        | 3.6                             |
| 16.                               | DFRFM8       | +(ve)           | -(ve)         | Homofermentative                        | 9.8                             |
| 17.                               | DFRFM9       | +(ve)           | -(ve)         | Homofermentative                        | 9.0                             |
| <b>III. Source: Homemade curd</b> |              |                 |               |                                         |                                 |
| 18.                               | DFRC1        | +(ve)           | -(ve)         | Homofermentative                        | 8.1                             |
| 19.                               | DFRC2        | +(ve)           | -(ve)         | Heterofermentative                      | 7.2                             |

|                                                  |       |       |                    |     |
|--------------------------------------------------|-------|-------|--------------------|-----|
| 20. DFRC3                                        | +(ve) | -(ve) | Homofermentative   | 7.2 |
| 21. DFRC4                                        | +(ve) | -(ve) | Homofermentative   | 4.5 |
| 22. DFRC6                                        | +(ve) | -(ve) | Homofermentative   | 5.4 |
| 23. DFRC8                                        | +(ve) | -(ve) | Homofermentative   | 3.6 |
| 24. DFRC11                                       | +(ve) | -(ve) | Heterofermentative | 4.5 |
| <b>IV. Source: Commercially available curd</b>   |       |       |                    |     |
| 25. DFRCM2                                       | +(ve) | -(ve) | Heterofermentative | 7.2 |
| 26. DFRCM1                                       | +(ve) | -(ve) | Homofermentative   | 8.1 |
| 27. DFRCM3                                       | +(ve) | -(ve) | Homofermentative   | 7.2 |
| 28. DFRCM4                                       | +(ve) | -(ve) | Homofermentative   | 5.4 |
| 29. DFRCM6                                       | +(ve) | -(ve) | Homofermentative   | 3.6 |
| <b>V. Source: Commercially available yoghurt</b> |       |       |                    |     |
| 30. DFRMY4                                       | +(ve) | -(ve) | Homofermentative   | 9.0 |
| 31. DFRMY1                                       | +(ve) | -(ve) | Heterofermentative | 7.2 |
| 32. DFRMY2                                       | +(ve) | -(ve) | Homofermentative   | 7.2 |
| 33. DFRMY3                                       | +(ve) | -(ve) | Homofermentative   | 4.5 |
| 34. DFRMY4                                       | +(ve) | -(ve) | Homofermentative   | 5.4 |
| 35. DFRMY5                                       | +(ve) | -(ve) | Homofermentative   | 3.6 |
| <b>VI. Source: Dairy waste</b>                   |       |       |                    |     |
| 36. DFRMW1                                       | +(ve) | -(ve) | Homofermentative   | 5.4 |
| 37. DFRMW2                                       | +(ve) | -(ve) | Homofermentative   | 5.4 |
| <b>VII. Source: Fruit waste</b>                  |       |       |                    |     |
| 38. DFRL1                                        | +(ve) | -(ve) | Homofermentative   | 8.1 |
| 39. DFRL2                                        | +(ve) | -(ve) | Heterofermentative | 7.2 |
| 40. DFRL3                                        | +(ve) | -(ve) | Homofermentative   | 7.2 |

|                                     |        |       |       |                    |      |
|-------------------------------------|--------|-------|-------|--------------------|------|
| <b>VIII. Source: Appam batter</b>   |        |       |       |                    |      |
| 41.                                 | DFRA3  | +(ve) | -(ve) | Homofermentative   | 6.3  |
| 42.                                 | DFRA4  | +(ve) | -(ve) | Heterofermentative | 6.3  |
| 43.                                 | DFRA9  | +(ve) | -(ve) | Homofermentative   | 9.9  |
| 44.                                 | DFRA3  | +(ve) | -(ve) | Homofermentative   | 6.3  |
| 45.                                 | DFRA4  | +(ve) | -(ve) | Heterofermentative | 6.3  |
| <b>IX. Source: Rava dosa batter</b> |        |       |       |                    |      |
| 46.                                 | DFRD1  | +(ve) | -(ve) | Homofermentative   | 7.2  |
| 47.                                 | DFRD2  | +(ve) | -(ve) | Homofermentative   | 7.2  |
| 48.                                 | DFRD3  | +(ve) | -(ve) | Homofermentative   | 8.1  |
| 49.                                 | DFRD4  | +(ve) | -(ve) | Homofermentative   | 9.9  |
| 50.                                 | DFRD11 | +(ve) | -(ve) | Homofermentative   | 9.0  |
| <b>X. Source: Idly batter</b>       |        |       |       |                    |      |
| 51.                                 | DFRI1  | +(ve) | -(ve) | Homofermentative   | 7.2  |
| 52.                                 | DFRI2  | +(ve) | -(ve) | Homofermentative   | 8.1  |
| 53.                                 | DFRI3  | +(ve) | -(ve) | Heterofermentative | 6.3  |
| 54.                                 | DFRI4  | +(ve) | -(ve) | Homofermentative   | 12.6 |
| 55.                                 | DFRI5  | +(ve) | -(ve) | Homofermentative   | 10.8 |
| 56.                                 | DFRI6  | +(ve) | -(ve) | Homofermentative   | 8.1  |
| <b>XI. Source: Dosa batter</b>      |        |       |       |                    |      |
| 57.                                 | DFRD1  | +(ve) | -(ve) | Homofermentative   | 7.2  |
| 58.                                 | DFRD2  | +(ve) | -(ve) | Homofermentative   | 7.2  |
| 59.                                 | DFRD3  | +(ve) | -(ve) | Homofermentative   | 8.1  |
| 60.                                 | DFRD4  | +(ve) | -(ve) | Homofermentative   | 9.9  |
| 61.                                 | DFRD11 | +(ve) | -(ve) | Homofermentative   | 9.0  |

**Supplementary Table 2: Levels of each factor**

| <b>Levels/Factors</b> | <b>Carbon source (%)</b> | <b>Inoculum (%)</b> | <b>Temperature (°C)</b> | <b>pH</b> |
|-----------------------|--------------------------|---------------------|-------------------------|-----------|
| High level            | 5.0                      | 5.0                 | 40.0                    | 8.0       |
| Medium level          | 3.0                      | 3.0                 | 30.0                    | 6.0       |
| Low level             | 2.0                      | 1.0                 | 20.0                    | 4.0       |

**Supplementary Table 3. Ranking of the most important factors**

| <b>Factor</b>     | <b>Rank</b> | <b>Type of relationship</b> |
|-------------------|-------------|-----------------------------|
| Carbon source (%) | 1           | Positive                    |
| Inoculum (%)      | 2           | Positive                    |
| Temperature (°C)  | 3           | Positive                    |
| pH                | 4           | Positive                    |

**Supplementary Table 4: Effects estimation of the factors tested**

| <b>Factors</b>                        | <b>Effect</b> | <b>Error</b> | <b>t</b> | <b>p</b>         |
|---------------------------------------|---------------|--------------|----------|------------------|
| Carbon source (%)                     | 12.46667      | 0.188713     | 66.0616  | <b>0.000000*</b> |
| Inoculum (%)                          | 4.21296       | 0.191316     | 22.0210  | <b>0.000000*</b> |
| Temperature (°C)                      | 1.20741       | 0.191316     | 6.3111   | <b>0.000000*</b> |
| pH                                    | 0.65185       | 0.191316     | 3.4072   | <b>0.001274*</b> |
| *Values are significant at $p < 0.05$ |               |              |          |                  |

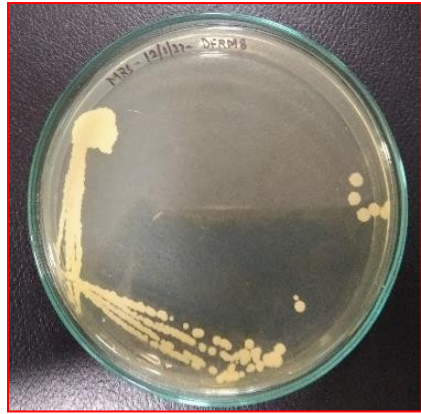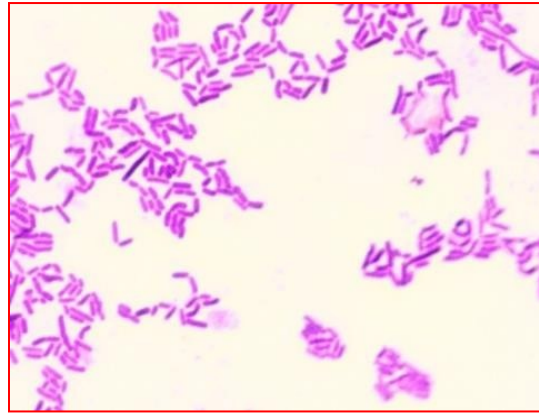

**Supplementary Figure 1. Colony morphology on MRS agar and microscopic view of *Limolactibacillus fermentum* DFRM8**

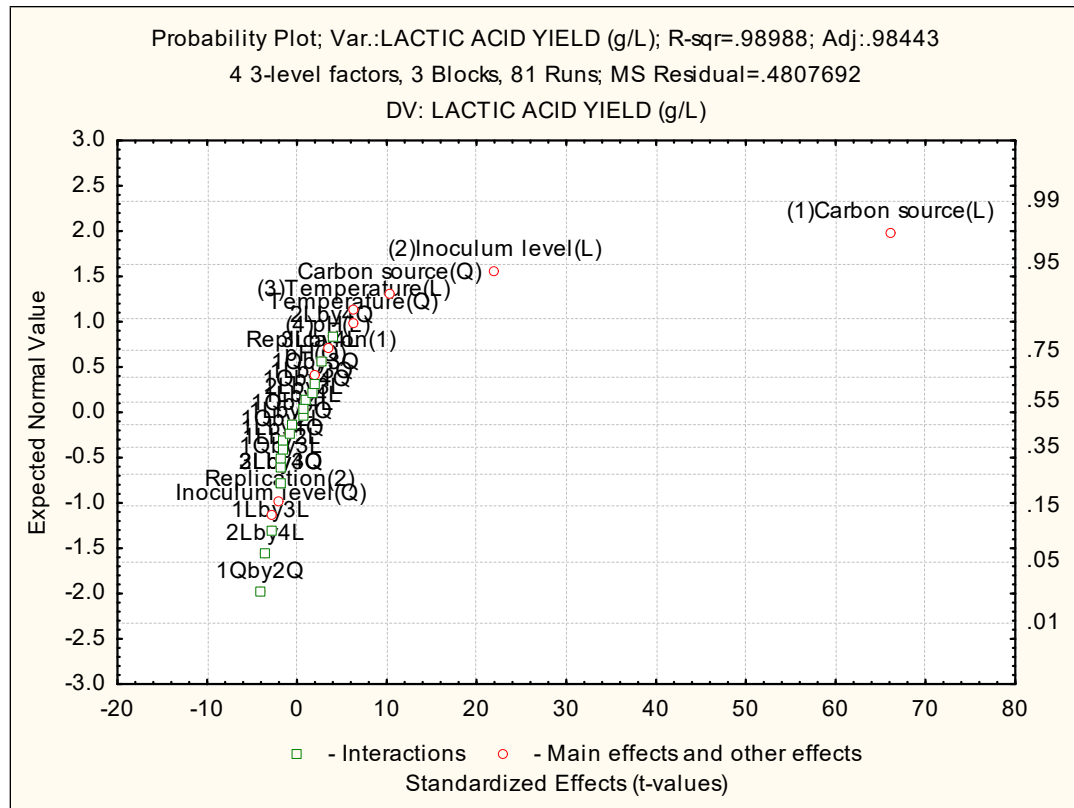

**Supplementary Figure 2. Normal probability plot of main and interactive effects for lactic acid production (g/L)**

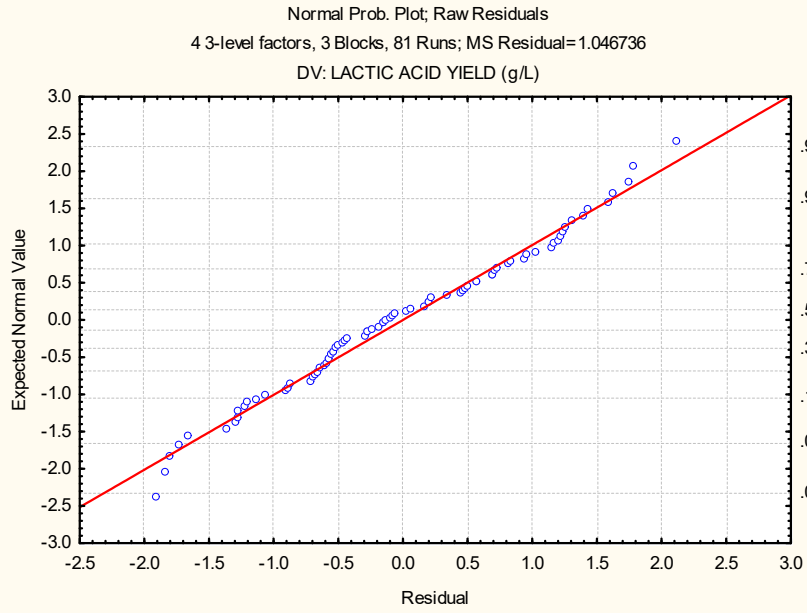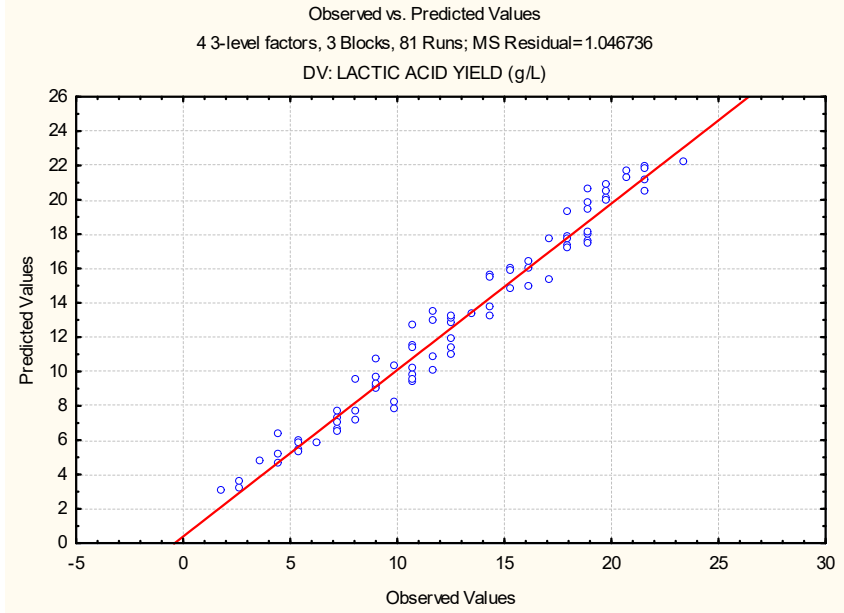

**Supplementary Figure 3. Plot of raw residuals & observed values versus predicted values for lactic acid production (g/L)**

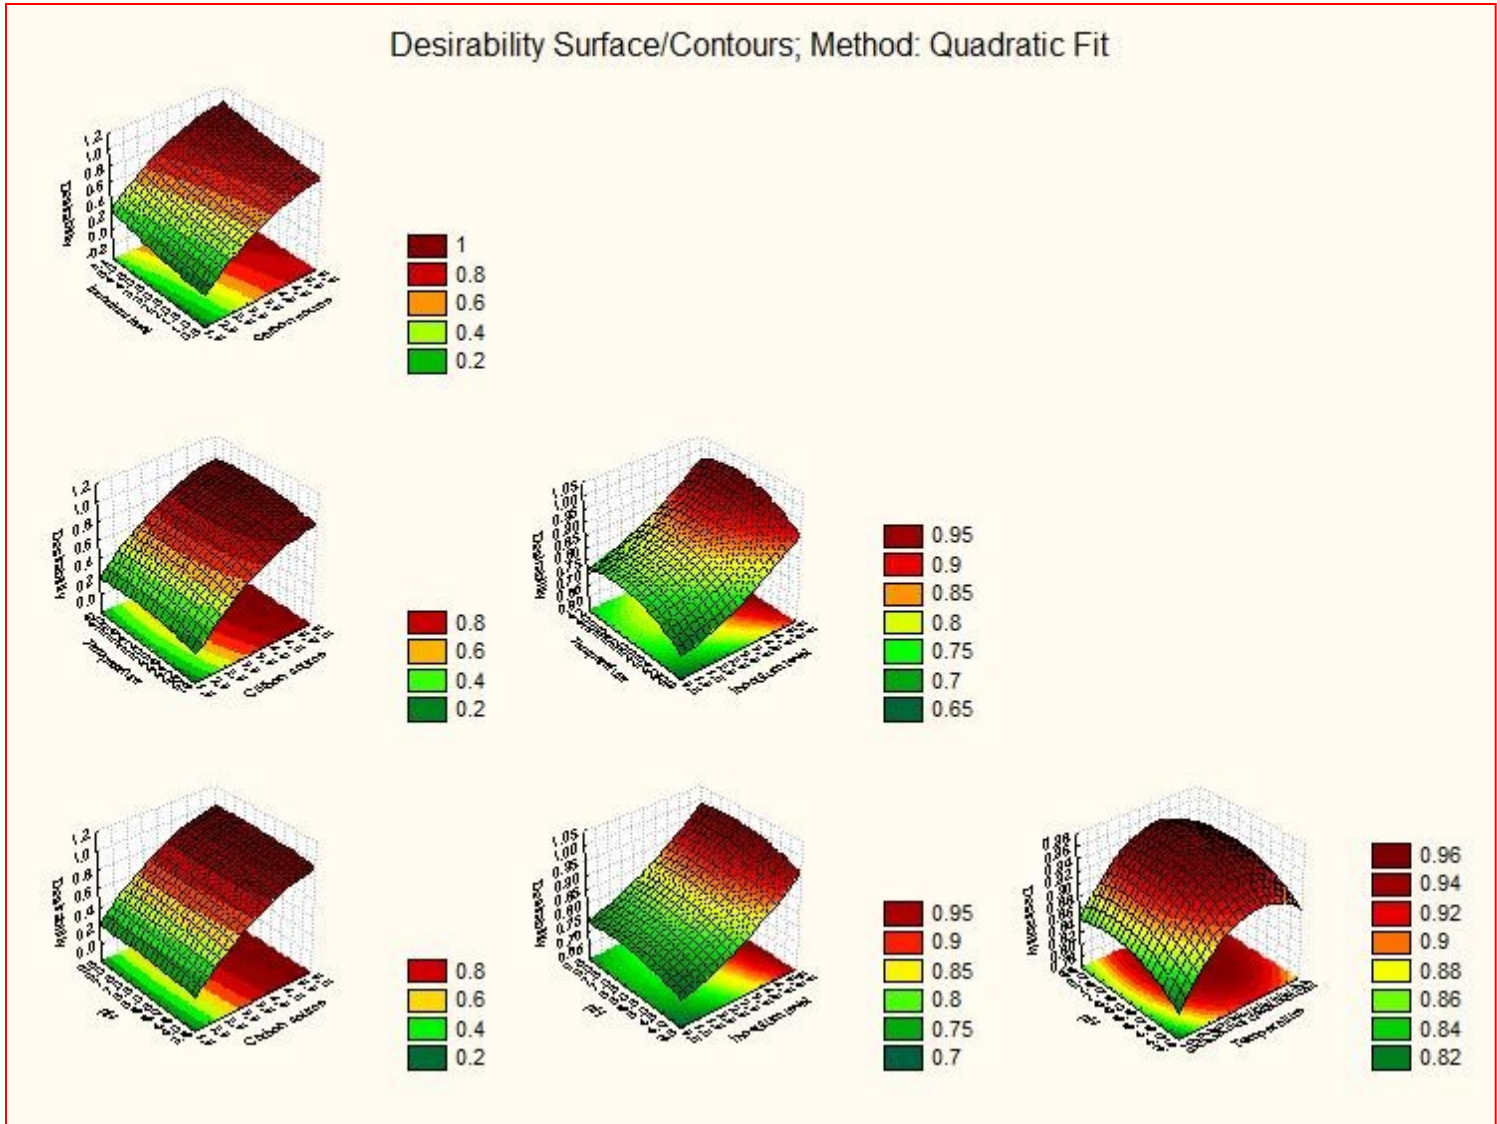

Supplementary Figure 4. Contour plot for desirability of lactic acid production (g/L)



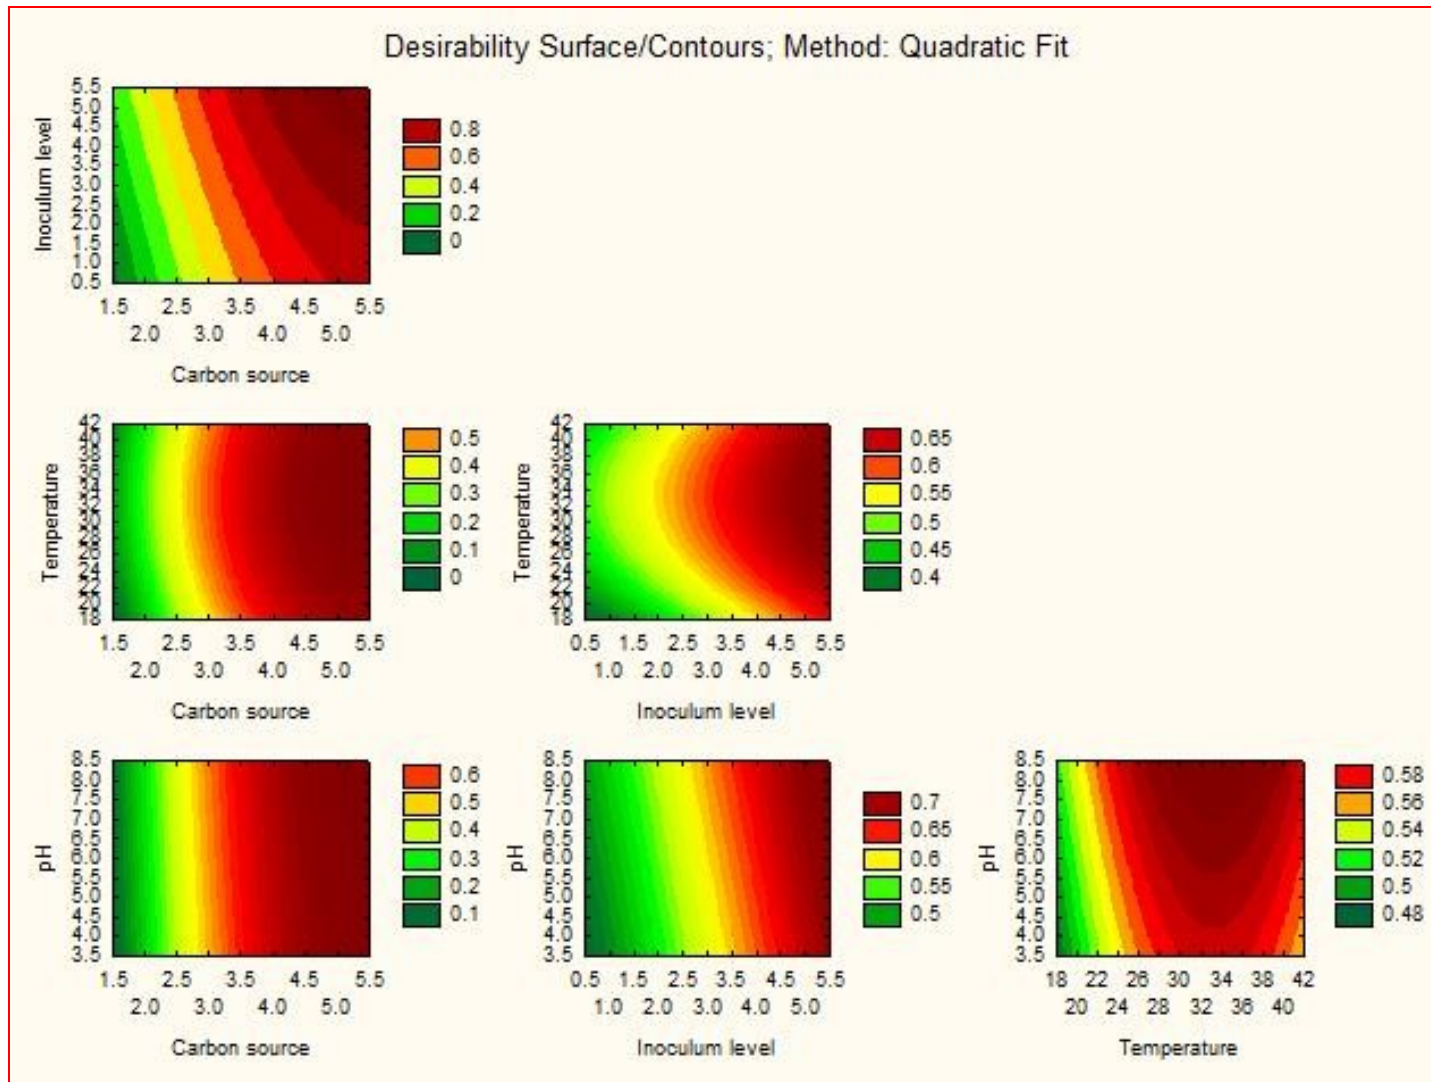

Supplementary Figure 5. Surface plot for desirability of lactic acid production (g/L)

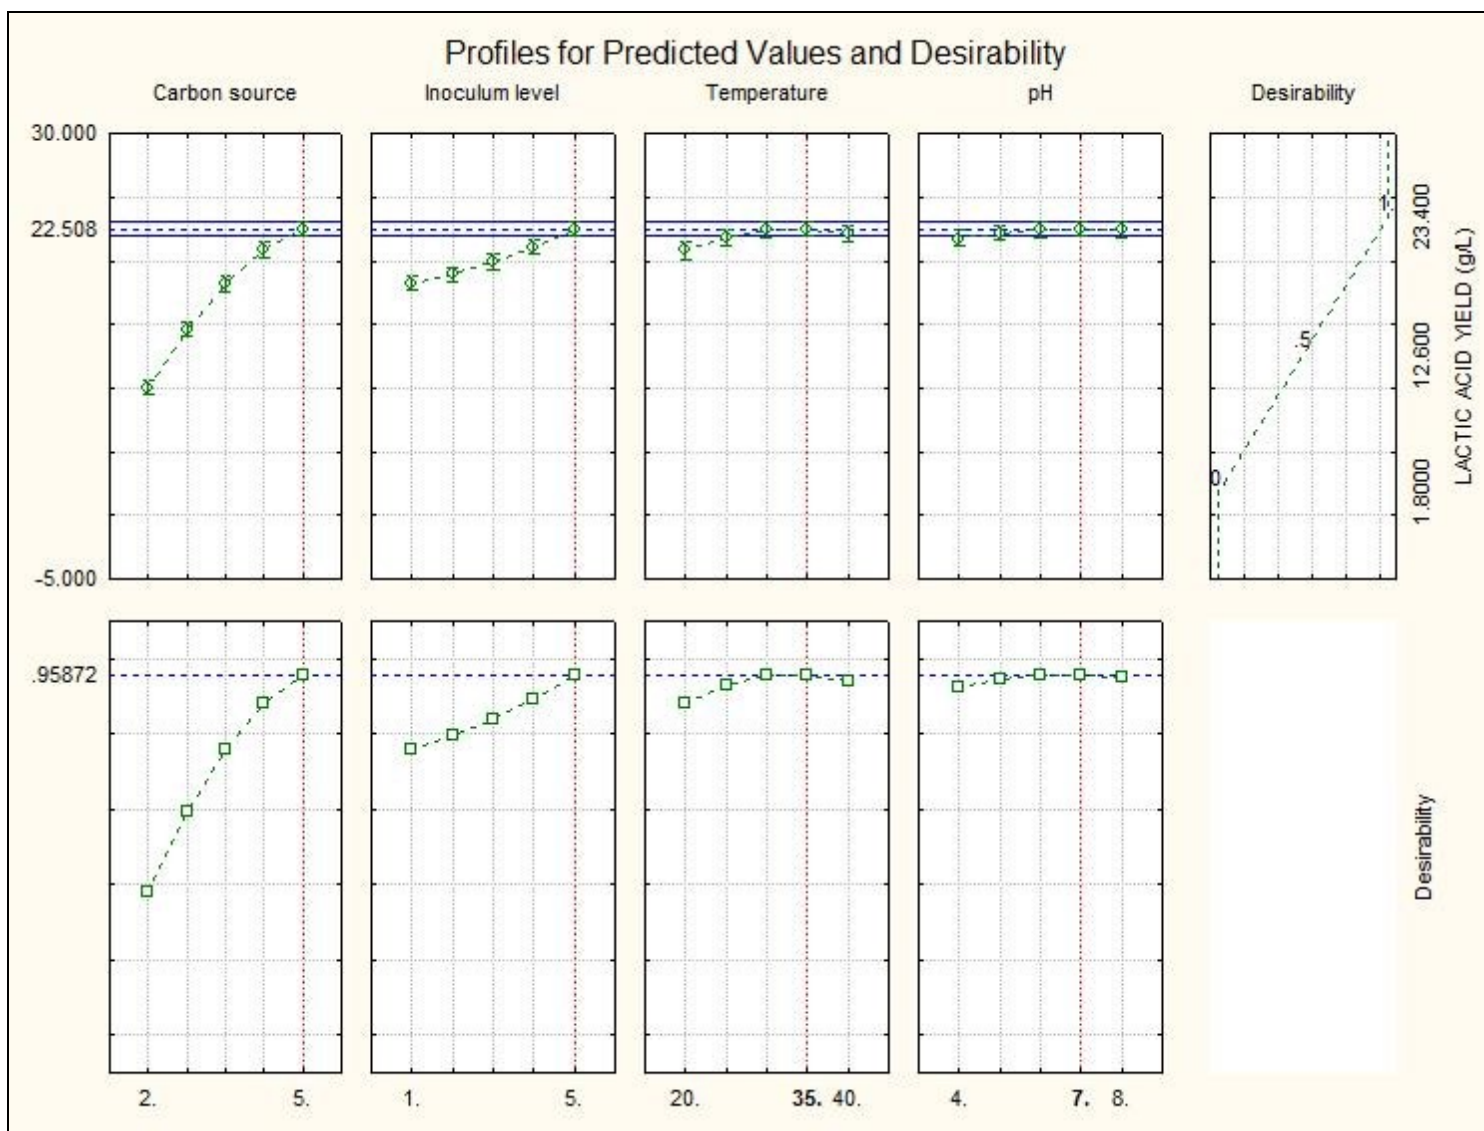

**Supplementary Figure 6. Profiles for predicted values and desirability for lactic acid production (g/L)**

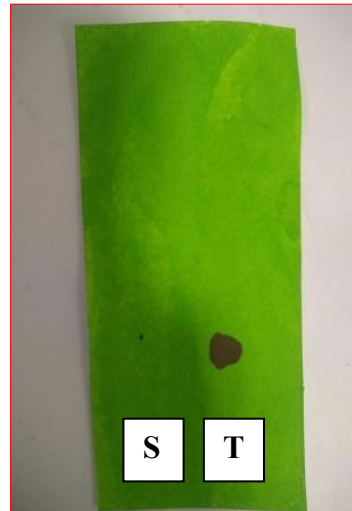

**Supplementary Figure 7. TLC plate of standard lactic acid (S) and lactic acid produced using *Limolactibacillus fermentum* DFRM8 (T)**

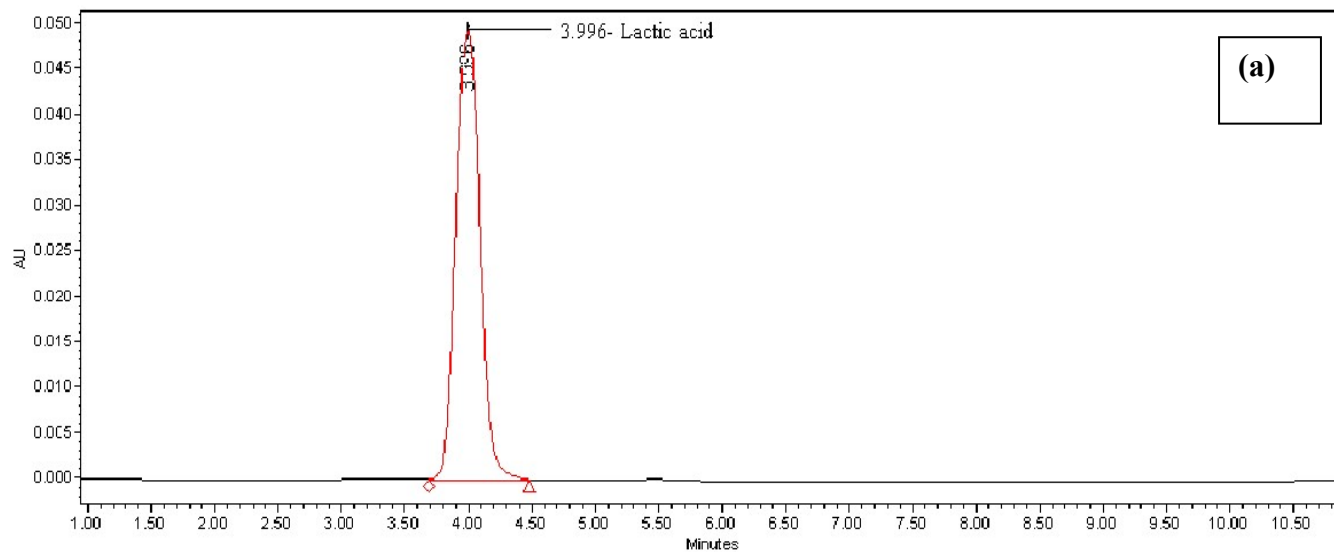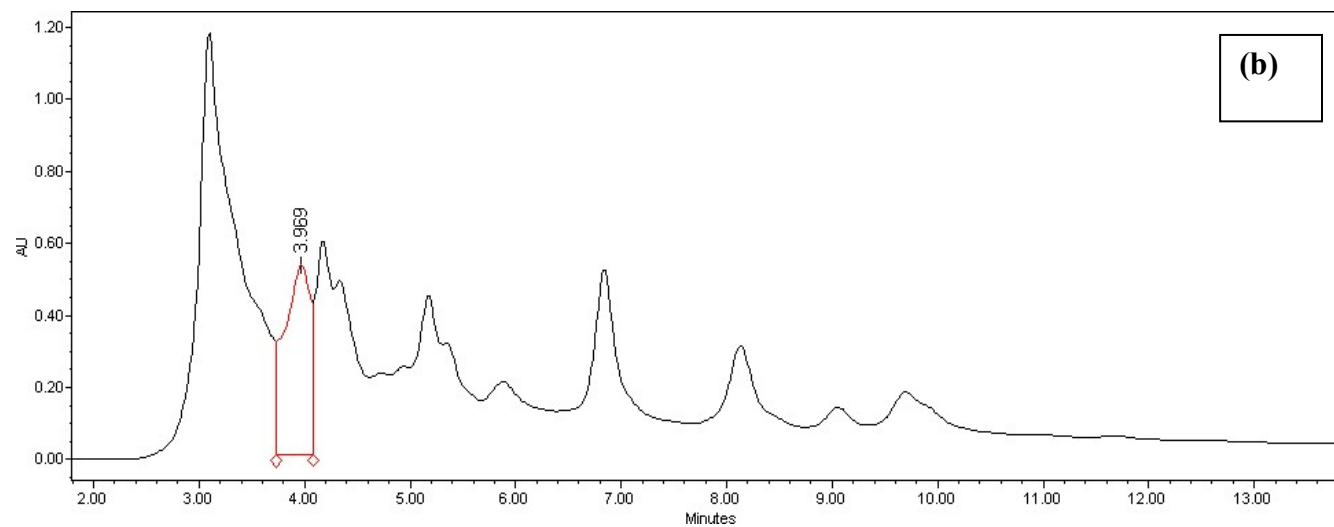

**Supplementary Figure 8. HPLC chromatogram of standard lactic acid (a) lactic acid produced using *Limolactibacillus fermentum* DFRM8 (b)**
